# Supplementary material for: A turn-on fluorescent probe for sensitive detection of ascorbic acid based on SiNP–MnO2nanocomposites
Source: Royal Society of Chemistry journal article supplement (doi:10.1039/c9nj02106j), 2019-01-01

## Electronic Supplementary Information

### A turn-on fluorescent probe for sensitive detection of ascorbic acid based on SiNPs-MnO<sub>2</sub> nanocomposites

Ke Xing,<sup>a</sup> Jia Ge,<sup>a,\*</sup> Wei-Xia Wang,<sup>a</sup> Xin Geng,<sup>a</sup> Xue-Ping Shen,<sup>a</sup> Jin-Lu Tang,<sup>b</sup>

Ling-Bo Qu,<sup>a</sup> Yuan-Qiang Sun,<sup>a</sup> Zhao-Hui Li<sup>a,\*</sup>

\*Corresponding author.

a College of Chemistry and Molecular Engineering, Zhengzhou University,  
Zhengzhou 450001, P.R. China;

b School of Basic Medical Sciences, Zhengzhou University, Zhengzhou 450001, P.R.  
China;

Tel.: +86-371-67783126

E-mail address: [jiage0630@hnu.edu.cn](mailto:jiage0630@hnu.edu.cn) (J. Ge), [zhaohui.li@zzu.edu.cn](mailto:zhaohui.li@zzu.edu.cn) (Z. H. Li)

**Fig. S1.** Fluorescence intensity variation of SiNPs at various pH values.

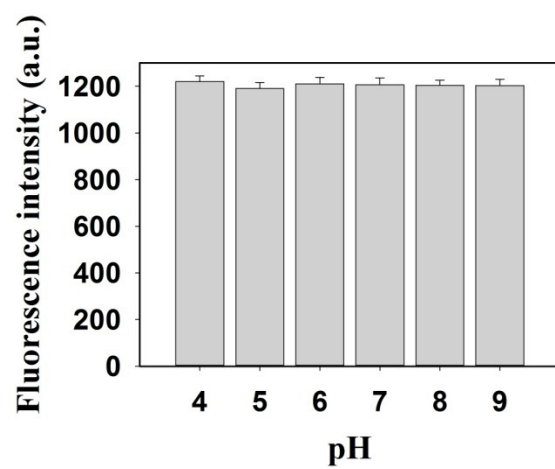

**Fig. S2.** Fluorescence intensity variation of SiNPs at various concentrations of NaCl.

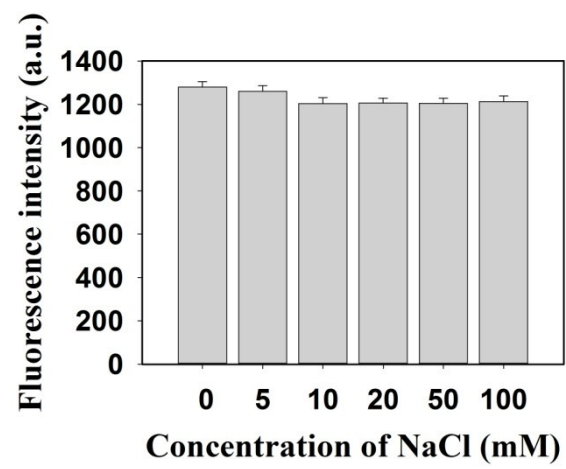

**Fig. S3.** Effects of UV irradiation time on the fluorescence intensity variation of the SiNPs.

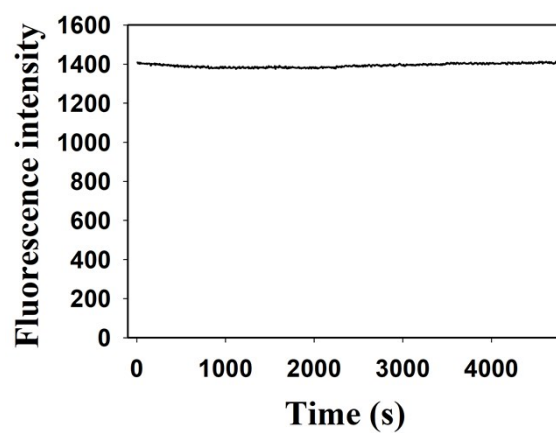

**Fig. S4.** TEM image of prepared BSA-templated MnO<sub>2</sub> nanosheets (A) and UV-vis absorption spectrum of MnO<sub>2</sub> nanosheets.

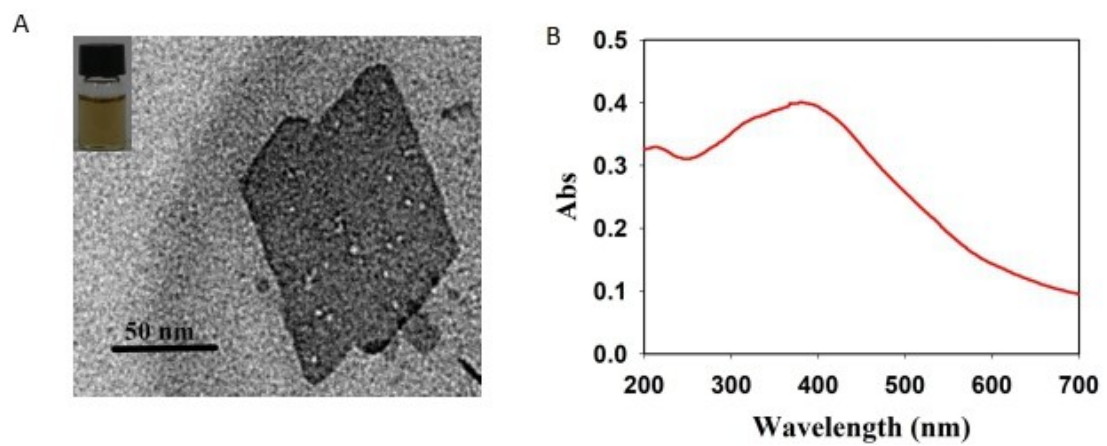

**Fig. S5.** FT-IR spectrum of BSA-templated MnO<sub>2</sub> nanosheets.

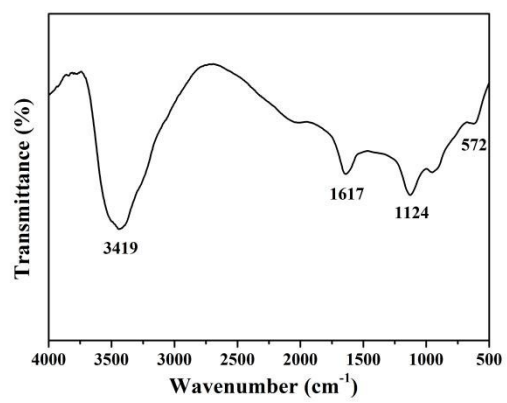

**Fig. S6.** Zeta potential of SiNPs, BSA-templated MnO<sub>2</sub> nanosheets, and the SiNPs-MnO<sub>2</sub> nanocomposites.

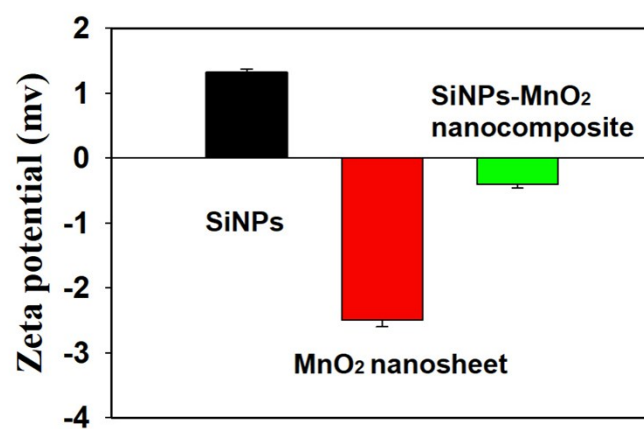

**Fig. S7.** Effect of the amount of BSA-templated MnO<sub>2</sub> nanosheets as quenchers on the fluorescence of the nanosystem. Error bars are standard deviation of three repetitive experiments.

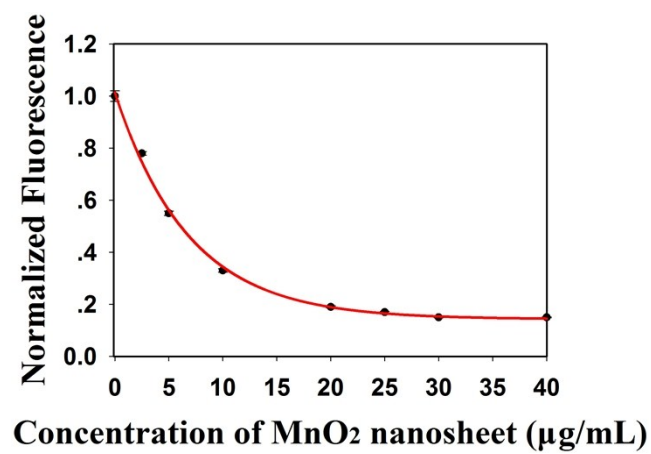



**Fig. S8.** Effect of reaction time on the fluorescence of the SiNPs-MnO<sub>2</sub> nanocomposites with ascorbic acid. Error bars are standard deviation of three repetitive experiments.

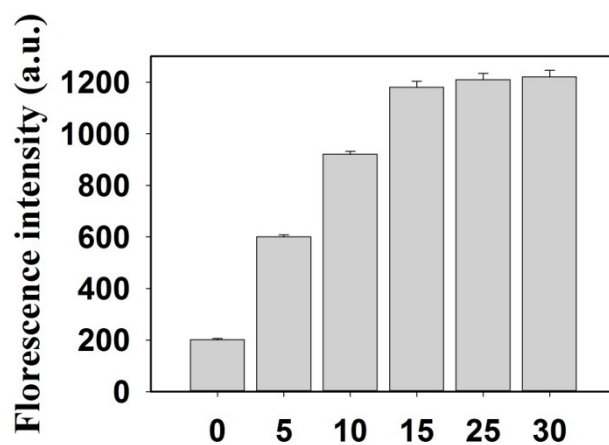

Supplement: c9nj02106j1.pdf [file c9nj02106j1.pdf]
